# Supplementary material for: Clinical and Molecular Features in Medulloblastomas Subtypes in Children in a Cohort in Taiwan
Source: MDPI journal article supplement (doi:10.3390/cancers14215419), 2022-11-03
Supplement: s1 [file s1]

# Clinical and molecular features in medulloblastomas subtypes in children in a cohort in Taiwan

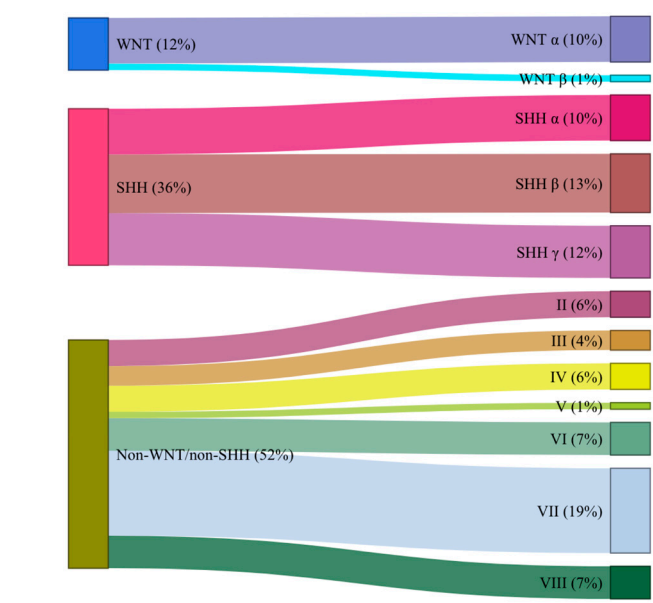

**Figure S1.** The clustering and relationship between subgroups and subtypes of MBs in this cohort.

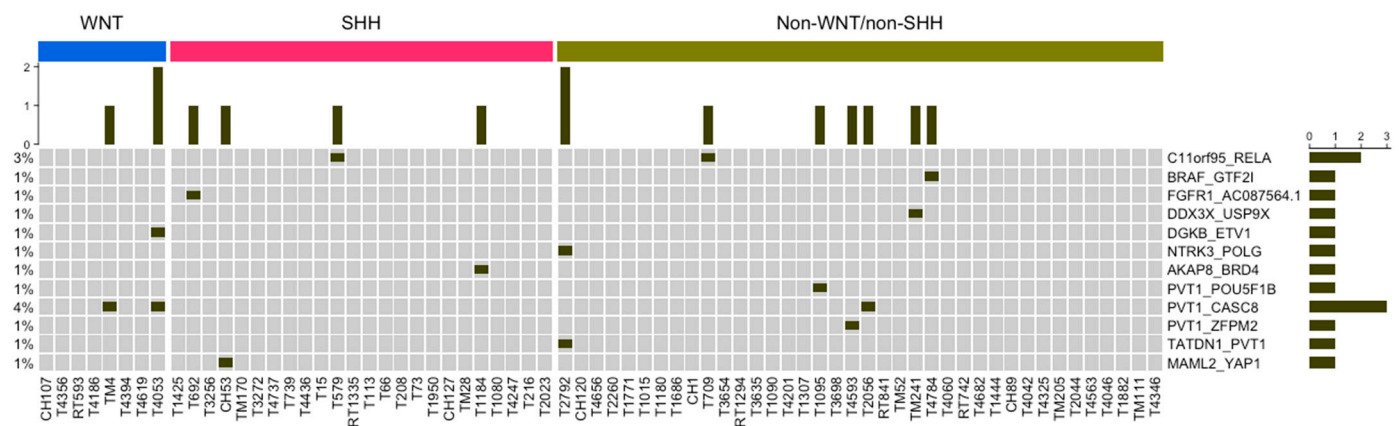

**Figure S2.** Fusion genes distributions in MB subgroups.

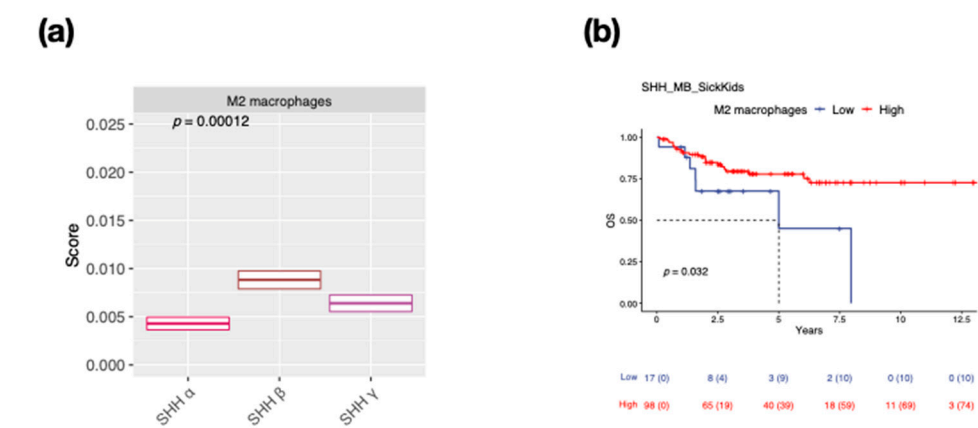

**Figure S3.** (a) The scores of the infiltrating M2 macrophages cells in SHH MB subtypes in the SickKids cohort.  $p$  value calculated by Kruskal-Wallis test. (b) The overall survival based on high or low M2 macrophages cells infiltration in SHH MBs in the SickKids cohort.  $p$  value calculated by log-rank test.

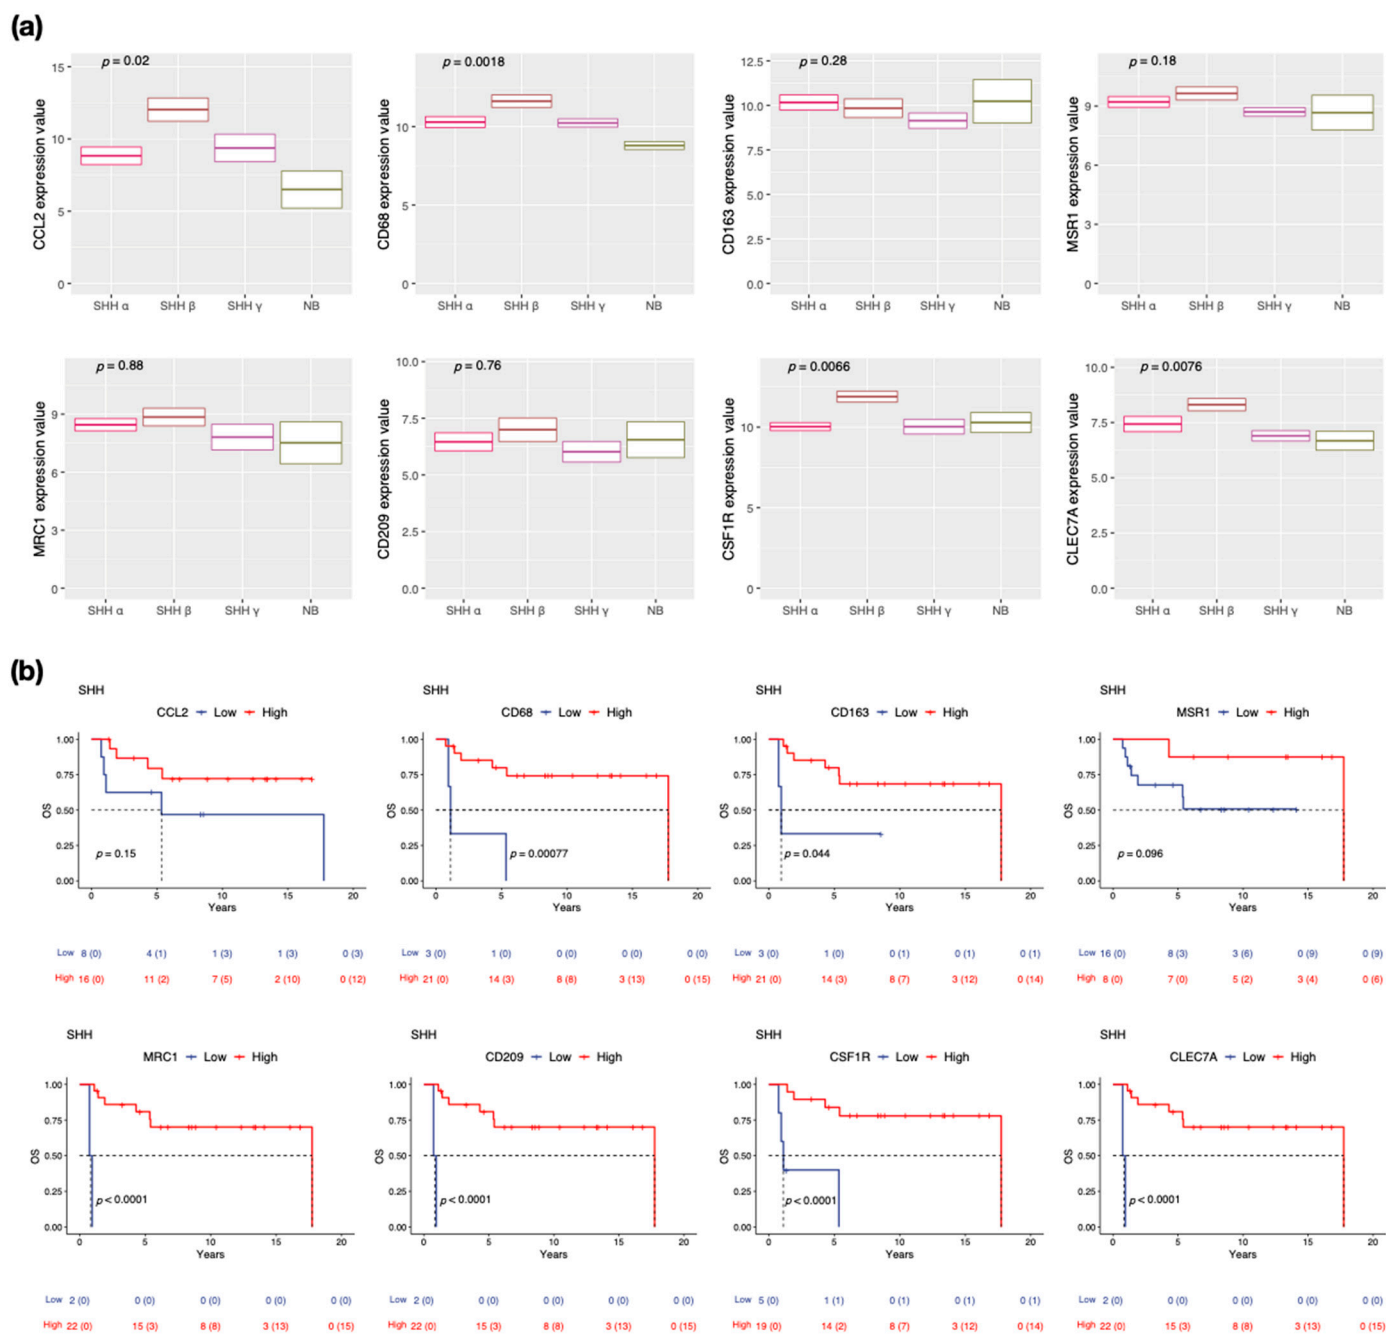

**Figure S4.** (a) The expression of CCL2, CD68, CD163, MSR1, MRC1, CD209, CSF1R, and CLEC7A in SHH MB subtypes.  $p$  value calculated by Kruskal-Wallis test. (b) The overall survival based on the expression of CCL2, CD68, CD163, MSR1, MRC1, CD209, CSF1R, and CLEC7A in SHH MBs.  $p$  value calculated by log-rank test.

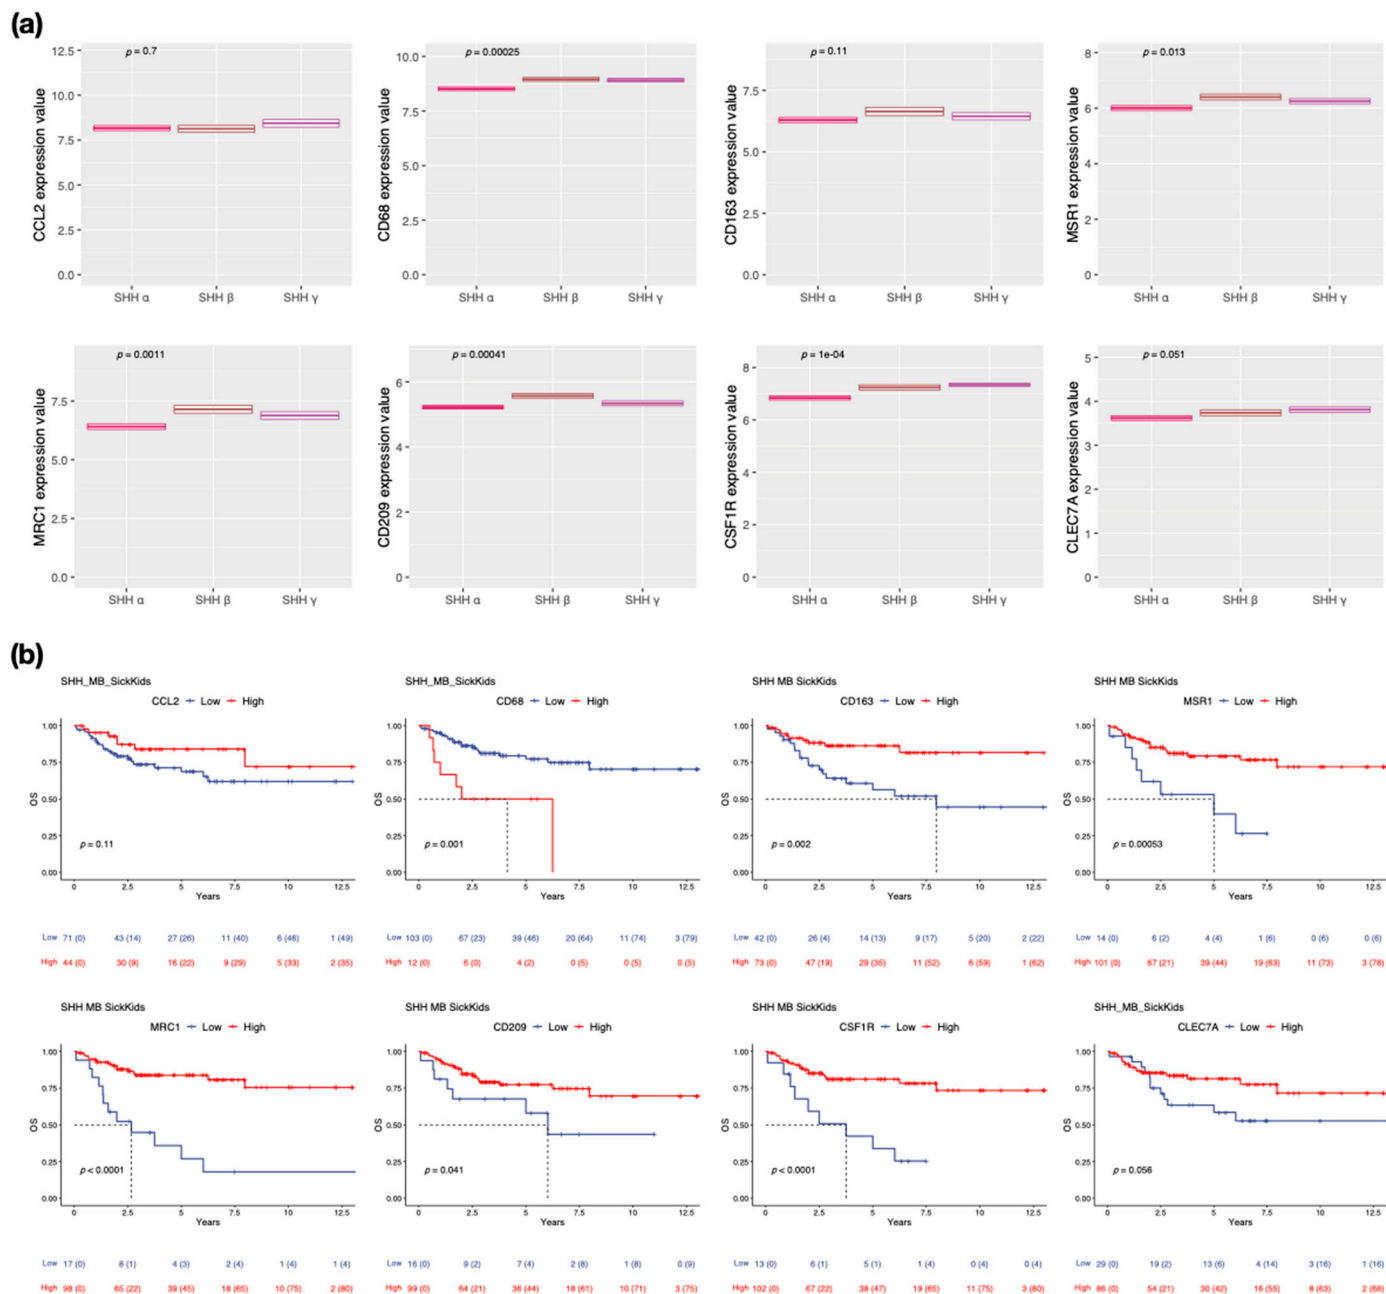

**Figure S5.** (a) The expression of CCL2, CD68, CD163, MSR1, MRC1, CD209, CSF1R, and CLEC7A in SHH MB subtypes in the SickKids cohort.  $p$  value calculated by Kruskal-Wallis test. (b) The overall survival based on the expression of CCL2, CD68, CD163, MSR1, MRC1, CD209, CSF1R, and CLEC7A in SHH MBs in the SickKids cohort.  $p$  value calculated by log-rank test.

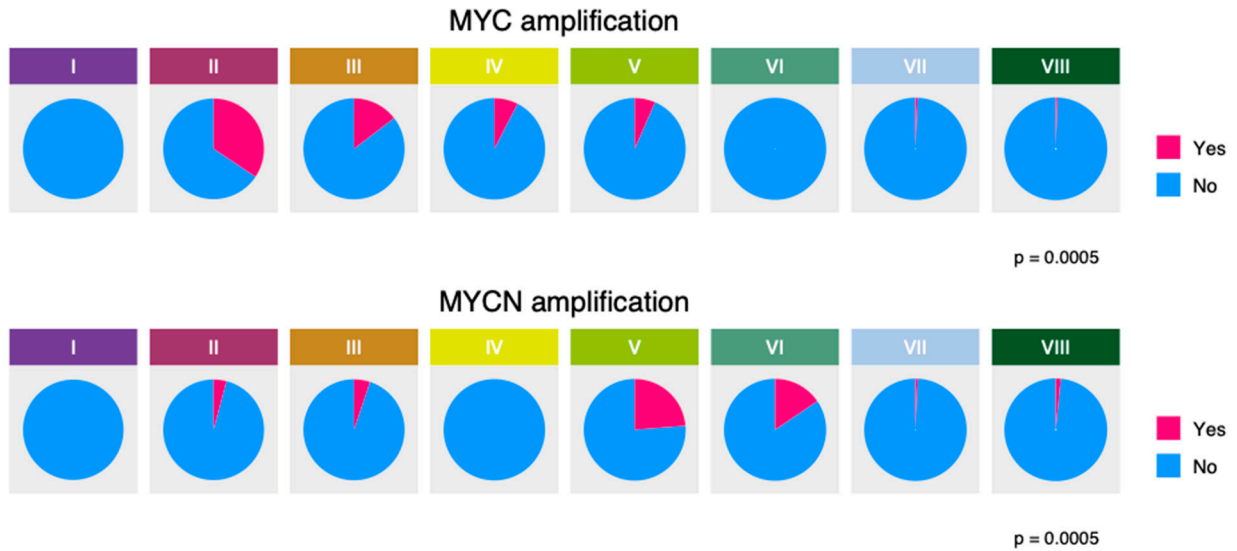

**Figure S6.** Distribution of focal MYC and MYCN events in non-WNT/non-SHH subtypes in Northcott et al. cohort.

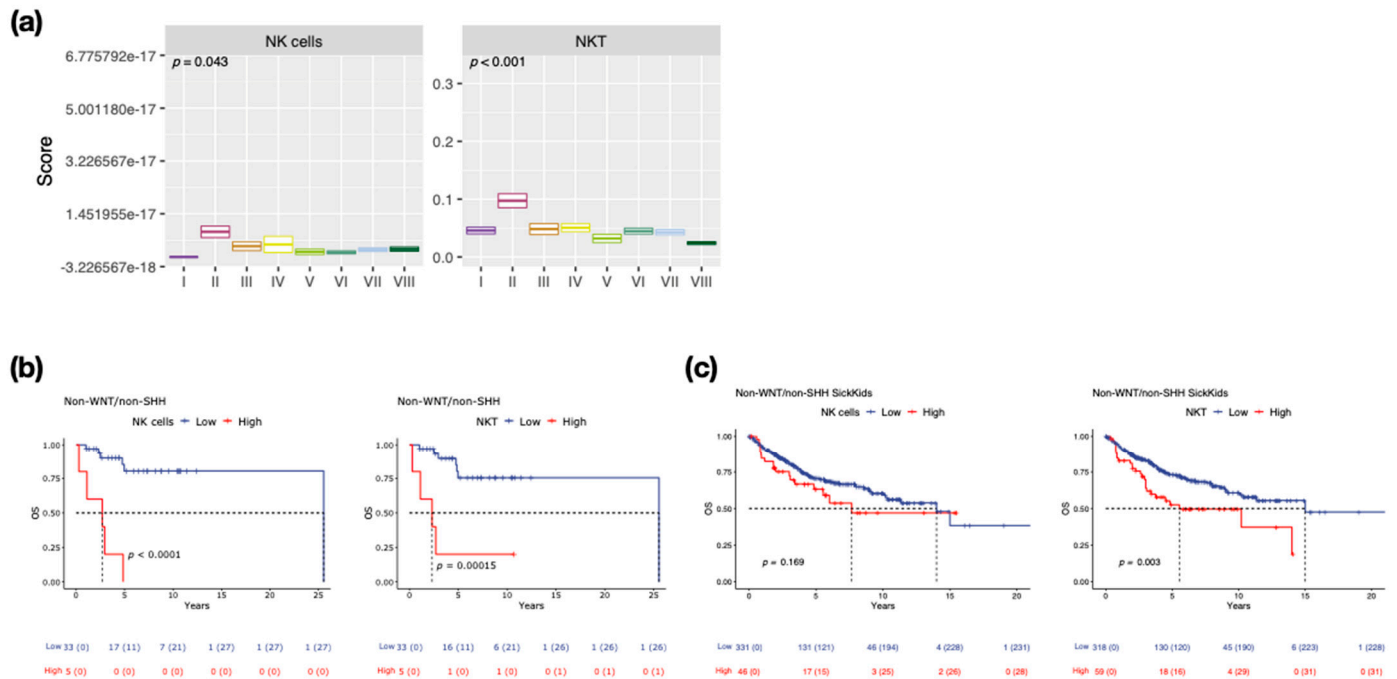

**Figure S7.** (a) The scores of the infiltrating NK and NKT cells in non-WNT/non-SHH MB subtypes in the SickKids cohort.  $p$  value calculated by Kruskal-Wallis test. The overall survival based on high or low NK or NKT cells infiltration in non-WNT/non-SHH MBs in our (b) and SickKids cohort (b).  $p$  value calculated by log-rank test.

**Table S1.** Demography and clinical annotations of molecular subtypes in our cohort series of 70 childhood Medulloblastomas (MBs) in Taiwan.

| N = 70                                                                                                                         | Molecular subgroup assignment |         |                     |                |               |               |                                 |               |         |                |                |                 |
|--------------------------------------------------------------------------------------------------------------------------------|-------------------------------|---------|---------------------|----------------|---------------|---------------|---------------------------------|---------------|---------|----------------|----------------|-----------------|
|                                                                                                                                | WNT, n = 8 (11.4%)            |         | SHH, n = 24 (32.7%) |                |               |               | Non-WNT/non-SHH, n = 38 (54.3%) |               |         |                |                |                 |
|                                                                                                                                | $\alpha$                      | $\beta$ | $\alpha$            | $\beta$        | $\gamma$      | II            | III                             | IV            | V       | VI             | VII            | VIII            |
|                                                                                                                                | 7                             | 1       | 7                   | 9              | 8             | 4             | 3                               | 4             | 1       | 5              | 13             | 5               |
| Frozen tissue for molecular profiling                                                                                          |                               |         |                     |                |               |               |                                 |               |         |                |                |                 |
| Primary tumor                                                                                                                  | 7                             | 1       | 6                   | 9              | 8             | 3             | 3                               | 4             | 1       | 5              | 11             | 4               |
| Recurrent tumor                                                                                                                | 0                             | 0       | 1                   | 0              | 0             | 1             | 0                               | 0             | 0       | 0              | 2              | 1               |
| Age (median, range) at diagnosis (years)                                                                                       |                               |         |                     |                |               |               |                                 |               |         |                |                |                 |
| 7.2 (0.3–18.2)                                                                                                                 | 7.9 (3.1–11.4)                |         | 4.1 (0.3–14.3)      |                |               |               | 6.9 (1.5–18.3)                  |               |         |                |                |                 |
|                                                                                                                                | 8.4 (4.0–11.4)                | 3.1     | 6.5 (2.8–12.6)      | 4.1 (3.5–14.3) | 1.4 (0.3–5.8) | 5.5 (1.5–9.1) | 4.3 (3.2–18.2)                  | 3.0 (2.4–4.0) | 15.4    | 6.6 (5.1–11.0) | 8.3 (2.4–18.3) | 10.1 (6.0–11.0) |
| Age distribution (%)                                                                                                           |                               |         |                     |                |               |               |                                 |               |         |                |                |                 |
| ≤3y, n = 13 (18.6)                                                                                                             | 0                             | 0       | 1 (14.3)            | 0              | 7 (87.5)      | 1 (25.0)      | 0                               | 2 (50.0)      | 0       | 0              | 1 (7.7)        | 0               |
| >3y, n = 57 (81.4)                                                                                                             | 7 (100)                       | 1       | 6 (85.7)            | 9 (100)        | 1 (12.5)      | 3 (75.0)      | 3 (100)                         | 2 (50.0)      | 1       | 5 (100)        | 12 (92.3)      | 5 (100)         |
| Sex                                                                                                                            |                               |         |                     |                |               |               |                                 |               |         |                |                |                 |
| Male, n = 35 (50%)                                                                                                             | 1                             | 0       | 4                   | 4              | 4             | 1             | 3                               | 3             | 1       | 4              | 8              | 2               |
| Female, n = 35 (50%)                                                                                                           | 6                             | 1       | 3                   | 5              | 4             | 3             | 0                               | 1             | 0       | 1              | 5              | 3               |
| Male/female ratio (1/1)                                                                                                        | 0.2/1                         |         | 1.3/1               | 0.8/1          | 1/1           | 0.3/1         |                                 | 3/1           |         | 4/1            | 1.6/1          | 0.7/1           |
| Metastasis stage at diagnosis (M0-1, M2-3), number of cases (%)                                                                |                               |         |                     |                |               |               |                                 |               |         |                |                |                 |
| M0-1, n = 50 (71.4)                                                                                                            | 7 (100)                       | 1 (100) | 6 (85.7)            | 6 (66.7)       | 8 (100)       | 2 (50.0)      | 2 (66.7)                        | 2 (50.0)      | 1 (100) | 3 (60.0)       | 8 (61.5)       | 4 (80.0)        |
| M2-3, n = 20 (28.6)                                                                                                            | 0                             | 0       | 1 (14.3)            | 3 (33.3)       | 0             | 2 (50.0)      | 1 (33.3)                        | 2 (50.0)      | 0       | 2 (40.0)       | 5 (38.5)       | 1 (20.0)        |
| Extent of resection (NTR-TR, residue tumor<1.5 cm <sup>2</sup> ; STR, residue tumor≥1.5 cm <sup>2</sup> ), number of cases (%) |                               |         |                     |                |               |               |                                 |               |         |                |                |                 |
| NTR-TR, n = 40 (57.1)                                                                                                          | 5 (71.4)                      | 1 (100) | 4 (57.1)            | 7 (77.8)       | 5 (62.5)      | 0             | 3 (100)                         | 2 (50.0)      | 1 (100) | 3 (60.0)       | 6 (46.2)       | 2 (40.0)        |
| STR, n = 30 (42.9)                                                                                                             | 2 (28.6)                      | 0       | 3 (42.9)            | 2 (22.2)       | 3 (37.5)      | 4 (100)       | 0                               | 2 (50.0)      | 0       | 2 (40.0)       | 7 (53.8)       | 3 (60.0)        |
| Pathology variant, number of cases (%)                                                                                         |                               |         |                     |                |               |               |                                 |               |         |                |                |                 |
| Classic, n = 34 (48.6)                                                                                                         | 4 (57.1)                      | 1 (100) | 2 (28.6)            | 7 (77.8)       | 3 (37.5)      | 1 (25.0)      | 1 (33.3)                        | 3 (75.0)      | 0       | 3 (60.0)       | 3 (23.1)       | 4 (80.0)        |
| DNMB, n = 11 (15.7)                                                                                                            | 1 (14.3)                      | 0       | 3 (42.9)            | 2 (22.2)       | 4 (50.0)      | 0             | 0                               | 0             | 0       | 0              | 1 (7.7)        | 0               |
| MBEN, n = 1 (1.4)                                                                                                              | 0                             | 0       | 0                   | 0              | 1 (12.5)      | 0             | 0                               | 0             | 0       | 0              | 0              | 0               |
| LCA, n = 23 (32.9)                                                                                                             | 2 (28.6)                      | 0       | 2 (28.6)            | 0              | 0             | 3 (75.0)      | 1 (33.3)                        | 1 (25.0)      | 1 (100) | 2 (40.0)       | 9 (69.2)       | 1 (20.0)        |
| MMMB, n = 1 (1.4)                                                                                                              | 0                             | 0       | 0                   | 0              | 0             | 0             | 1 (33.3)                        | 0             | 0       | 0              | 0              | 0               |
| Molecular subgroup-based clinical risk stratification, number of cases                                                         |                               |         |                     |                |               |               |                                 |               |         |                |                |                 |
| Non-met (M0-1) AR, n = 34                                                                                                      | 7                             | 1       | 4                   | 6              | 5             | 0             | 2                               | 1             | 1       | 2              | 3              | 2               |
| Non-met (M0-1) HR, n = 16                                                                                                      | 0                             | 0       | 2                   | 0              | 3             | 2             | 0                               | 1             | 0       | 1              | 5              | 2               |
| Met (M2-3) HR, n =                                                                                                             | 0                             | 0       | 1                   | 3              | 0             | 2             | 1                               | 2             | 0       | 2              | 5              | 1               |

|                                                     |                |         |                |                 |                |               |               |                |         |               |                |                 |
|-----------------------------------------------------|----------------|---------|----------------|-----------------|----------------|---------------|---------------|----------------|---------|---------------|----------------|-----------------|
| 20                                                  |                |         |                |                 |                |               |               |                |         |               |                |                 |
| Treatment strategy, number of cases (%)             |                |         |                |                 |                |               |               |                |         |               |                |                 |
| CMT alone, n = 4 (5.7)                              | 0              | 0       | 0              | 0               | 3 (37.5)       | 0             | 1 (33.3)      | 0              | 0       | 0             | 0              | 0               |
| RT alone, n = 5 (7.1)                               | 0              | 0       | 1 (14.3)       | 0               | 1 (12.5)       | 1 (25.0)      | 0             | 0              | 0       | 0             | 1 (7.7)        | 0               |
| RT+CMT, n = 60 (85.7)                               | 7 (100)        | 1 (100) | 6 (85.7)       | 9 (100)         | 4 (50.0)       | 3 (75.0)      | 2 (66.7)      | 3 (75.0)       | 1 (100) | 5 (100)       | 12 (92.3)      | 5 (100)         |
| HDT/SCR, n = 1 (1.4)                                | 0              | 0       | 0              | 0               | 0              | 0             | 0             | 1 (25.0)       | 0       | 0             | 0              | 0               |
| Recurrence, number of cases (%)                     |                |         |                |                 |                |               |               |                |         |               |                |                 |
| Recurrence, n = 27 (38.6)                           | 1 (14.3)       | 0       | 2 (28.6)       | 5 (55.6)        | 4 (50.0)       | 4 (100)       | 2 (66.7)      | 1 (25.0)       | 0       | 1 (20.0)      | 3 (23.1)       | 2 (40.0)        |
| Time from diagnosis to the first recurrence (years) |                |         |                |                 |                |               |               |                |         |               |                |                 |
| Median time (range)                                 | 1.5            |         | 0.8 (0.7-0.9)  | 2.6 (0.9-16.3)  | 0.7 (0.3-2.3)  | 1 (0.2-2.5)   | 1.4 (0.6-2.2) | 0.9            |         | 1.5           | 1.9 (1.4-2.3)  | 10.4 (2.1-18.8) |
| Median follow-up time (range) (years)               |                |         |                |                 |                |               |               |                |         |               |                |                 |
| 5.1 (0.3-25.5)                                      | 4.9 (2.8-11.7) | 5.6     | 5.4 (1.1-16.8) | 12.3 (1.9-17.7) | 5.7 (0.7-13.4) | 1.1 (0.3-4.8) | 8.8 (1.1-9.6) | 9.7 (2.5-11.5) | 3.7     | 2.6 (1.4-7.4) | 5.2 (2.5-12.5) | 5.9 (1.8-25.5)  |
| Survivals of molecular subgroup (%)                 |                |         |                |                 |                |               |               |                |         |               |                |                 |
| 5-year OS rate: 74.1                                | 100            | 100     | 85.7           | 77.8            | 62.5           | 0             | 100           | 100            |         | 50.0          | 71.8           | 100             |
| 5-year RFS rate: 63                                 | 85.7           | 100     | 71.4           | 66.7            | 50.0           | 0             | 33.3          | 75.0           |         | 50.0          | 65.9           | 75.0            |

TR: Total resection, NTR: Near total resection, STR: Subtotal tumor resection, DNMB: Desmoplastic/nodular medulloblastoma, MBEN: Medulloblastoma with extensive nodularity, LCA: Large-cell/anaplastic, MMB: Medulloblastoma with melanotic myogenic differentiation, Non-met: Nonmetastasis, Met: metastasis, M0-1: no metastasis to presence of tumor cells in CSF, M2: intracranial subarachnoid space or intracranial compartment metastasis, M3: intraspinal subarachnoid space metastasis, AR: average-risk, HR: high-risk, CMT: Chemotherapy, RT: Radiotherapy, HDT/SCR: high-dose therapy with stem-cell rescue, OS: Overall survival, RFS: Relapse-free survival.

**Table S2.** Comparison of demographic and clinical annotations of SHH MB subtypes in our and SickKids cohorts.

| SHH                                      |               |               |               |              |              |               |
|------------------------------------------|---------------|---------------|---------------|--------------|--------------|---------------|
| Subtype                                  | $\alpha$      |               | $\beta$       |              | $\gamma$     |               |
| Study cohort                             | Our           | SickKids      | Our           | SickKids     | Our          | SickKids      |
| Frequency (%)                            | 29.2          | 44.2          | 37.5          | 23.8         | 33.3         | 32.0          |
| Age (median, range) at diagnosis (years) | 6.5, 2.8–12.6 | 8.0, 2.0–45.0 | 4.1, 3.5–14.3 | 1.9, 0.2–6.0 | 1.4, 0.3–5.8 | 1.3, 0.5–41.7 |
| Male/female ratio                        | 1.3           | 1.7           | 0.8           | 0.9          | 1.0          | 1.2           |
| Pathology variant (%)                    |               |               |               |              |              |               |
| Classic                                  | 28.6          | 48.1          | 77.8          | 40.0         | 37.5         | 20.9          |
| DNMB                                     | 42.9          | 28.8          | 22.2          | 53.3         | 50.0         | 53.5          |
| MBEN                                     | 0             | 0             | 0             | 0            | 12.5         | 20.9          |
| LCA                                      | 28.6          | 23.1          | 0             | 6.67         | 0            | 4.7           |
| Metastasis (%)                           | 14.3          | 20.0          | 33.3          | 33.3         | 0            | 9.4           |
| 5-year OS (%)                            | 85.7          | 69.8          | 77.8          | 67.3         | 62.5         | 88.0          |

DNMB: Desmoplastic/nodular medulloblastoma, MBEN: Medulloblastoma with extensive nodularity, LCA: Large-cell/anaplastic, OS: Overall survival.

**Table S3.** Comparison of demographic and clinical annotations of non-WNT/non-SHH MB subtypes in our and SickKids cohorts.

| Non-WNT/non-SHH                          |     |               |              |               |               |               |              |              |      |               |               |             |               |               |                |                |
|------------------------------------------|-----|---------------|--------------|---------------|---------------|---------------|--------------|--------------|------|---------------|---------------|-------------|---------------|---------------|----------------|----------------|
| Subtype                                  | I   |               | II           |               | III           |               | IV           |              | V    |               | VI            |             | VII           |               | VIII           |                |
| Study cohort                             | Our | Sick Kids     | Our          | Sick Kids     | Our           | Sick Kids     | Our          | Sick Kids    | Our  | Sick Kids     | Our           | Sick Kids   | Our           | Sick Kids     | Our            | Sick Kids      |
| Frequency (%)                            | 0   | 1.9           | 11.4         | 11.8          | 8.6           | 6.8           | 11.4         | 7.4          | 2.9  | 5.6           | 14.3          | 9.6         | 37.1          | 28.9          | 14.3           | 28.0           |
| Age (median, range) at diagnosis (years) |     | 6.5, 4.0-46.5 | 5.5, 1.5-9.1 | 4.7, 2.0-13.0 | 4.3, 3.2-18.2 | 4.9, 2.0-49.6 | 3.0, 2.4-4.0 | 3.6, 1.2-8.2 | 15.4 | 9.0, 2.8-17.0 | 6.6, 5.1-11.0 | 7, 2.5-18.0 | 8.3, 2.4-18.3 | 8.0, 1.0-21.0 | 10.1, 6.0-11.0 | 10.0, 4.0-48.2 |
| Male/female ratio                        |     | 0.7           | 0.3          | 2.5           |               | 10.0          | 3.0          | 3.2          |      | 4.7           | 4             | 1.6         | 1.6           | 1.7           | 0.7            | 3.0            |
| Pathology variant (%)                    |     |               |              |               |               |               |              |              |      |               |               |             |               |               |                |                |
| Classic                                  |     | 75.0          | 25.0         | 52.4          | 33.3          | 80.0          | 75.0         | 68.8         | 0    | 50.0          | 60.0          | 69.6        | 23.1          | 80.5          | 80.0           | 93.6           |
| DNMB                                     |     | 0             | 0            | 4.8           | 0             | 0             | 0            | 18.8         | 0    | 33.3          | 0             | 8.7         | 7.7           | 10.4          | 0              | 4.8            |
| MBEN                                     |     | 0             | 0            | 4.8           | 0             | 0             | 0            | 0            | 0    | 8.3           | 0             | 4.3         | 0             | 2.6           | 0              | 1.6            |
| LCA                                      |     | 25.0          | 75.0         | 38.1          | 33.3          | 20.0          | 25.0         | 12.5         | 100  | 8.3           | 40.0          | 17.4        | 69.2          | 6.5           | 20.0           | 0              |
| MMMB                                     |     | 0             | 0            | 0             | 33.3          | 0             | 0            | 0            | 0    | 0             | 0             | 0           | 0             | 0             | 0              | 0              |
| Metastasis (%)                           |     | 0             | 50.0         | 52.0          | 33.3          | 38.9          | 50.0         | 58.8         | 0    | 46.7          | 40.0          | 30.4        | 38.5          | 36.1          | 20.0           | 40.3           |
| 5-year OS (%)                            |     | 100           | 0            | 47.6          | 100           | 36.5          | 100          | 93.3         |      | 70.7          | 50.0          | 92.3        | 71.8          | 79.1          | 100            | 78.2           |

DNMB: Desmoplastic/nodular medulloblastoma, MMMB: Medulloblastoma with melanotic myogenic differentiation, LCA: Large-cell/anaplastic, OS: Overall survival.
